# Supplementary material
Source: PubMed Central journal article supplement (PMC4308039)
Supplement: NIHMS652130-supplement-suppl__data.pdf [file NIHMS652130-supplement-suppl__data.pdf]

| #         | Pulse_program | dim | spec_type | Sync | Spec_name        | Label  | Proc  | Ext | Cmp | Y-axis_P0_P1 | Z-axis_P0_P1 |
|-----------|---------------|-----|-----------|------|------------------|--------|-------|-----|-----|--------------|--------------|
| HSQC      | hsqc          | 2D  | hsqc      | N    | "15N-HSQC"       | HN N X | 1 2 3 | EXX | DRX | -90.0        | 180.0        |
| CHSQC     | chsqc         | 2D  | chsqc     | AW   | "13C-HSQC aliqh" | HC C X | 1 2 3 | EXX | DRX | -90.0        | 180.0        |
| CHSQC_ARO | chsqc_aro     | 2D  | chsqc_aro | AR   | "13C-HSQC arom"  | HC C X | 1 2 3 | EXX | DRX | -90.0        | 180.0        |
| CBCACONH  | cbcaconh      | 3D  | cbcaconh  | N    | "CBCA(CO)NH"     | HN N C | 1 3 2 | EXX | DCC | 22.0         | -29.0        |
| CCCONNH   | ccconnh       | 3D  | ccconnh   | N    | "CC(CO)NH"       | HN N C | 1 3 2 | EXX | DCC | 6.0          | -20.0        |
| HBHACONH  | hbhaconh      | 3D  | hbhaconh  | N    | "HBHA(CO)NH"     | HN N H | 1 3 2 | EEX | DCC | 0.0          | 0.0          |
| HCCCONNH  | hccconnh      | 3D  | hccconnh  | N    | "H(CC)(CO)NH"    | HN N H | 1 3 2 | EEX | DCC | 0.0          | 0.0          |
| HNCA      | hnca          | 3D  | hnca      | N    | "HNCA"           | HN N C | 1 3 2 | EXX | DCC | 0.0          | 0.0          |

Fig. S1. Example of PP\_list.txt file for make\_macro. This file lists the spectrum type of the pulse programs that have been used for multi-dimensional NMR experiments. The name of the pulse program should match with the experiment name described in the header of the pulse program file in the standard Bruker format. The file name of the template NMRPipe macro file should include the name. For example, "CBCACONH" macro file name should be CBCACONH.conv for FID conversion, xy\_CBCACONH.com for xy-dimension Fourier transformation and z\_CBCACONH.com for z-dimension Fourier transformation and conversion to NMRView format. Each spectrum type should have a unique name as specified in the third column in the list. Other columns, dim: dimension of the spectrum, Sync: sync-jump type in KUIRA setting, Label: labels for all axis, Proc: processed axis order, Ext: extraction applied (E) or not (X), Y-axis\_, Z-axis\_P0\_P1 phase correction for y- and z-dimension, respectively.

```

name targ C13_15N_Ubiquitin
name work current
name macro macros
name templ template
name fid fid
name ft ft
name nv nv
name plist bruker_PP.list

proc vender Bruker
proc group KUJG
proc carib auto
proc pdata "2 1"

ft swap -noswap
exx1 N 5.5
exx2 N 11.0
exx1 AW -2.0
exx2 AW 9.0
exx1 AL -2.0
exx2 AL 6.0
exx1 AR 5.0
exx2 AR 9.0

```

Fig. S2 Example of a pref.txt file for make\_macro. This file specifies the name of the target sample (targ), the name of the pulse program list (plist). The parameters, "exx1" and "exx2" indicate extraction points (ppm) for the first and second dimensions of corresponding spectrum types with sync-jump type N ( $^1\text{H}$ - $^{15}\text{N}$ ), AW ( $^1\text{H}$ - $^{13}\text{C}$  of aliphatic and aromatic groups), AL ( $^1\text{H}$ - $^{13}\text{C}$  of aliphatic groups) or AR ( $^1\text{H}$ - $^{13}\text{C}$  of aromatic groups).

**Figure S3, Kobayashi, N. et al**

```
Entry          RIKEN_entry_ID      1 "BMRB demo"
Entry          molecular_system    1 "Single polypeptide"
Entry          non_standard_residue 1 "no"
Entry          metal_ligand        1 "no"
Entry          structural_genomics  1 "yes"
Entry          shift_file          1 "demo.str"
Entry          title                1 "Solution structure of 13C/15N labeled protein"
Entry          Release              1 "Hold for publication"
Entry          entry_author         1 "Kobayashi, N."
Entry          entry_author         2 "Harano, Y."
Entry          entry_author         3 "Nakatani, E."
Entry          entry_author         4 "Fujiwara, T."
Entry          entry_author         5 "Akutsu, H."
Contact        contact_author       1 "Naohiro Kobayashi"
Contact        contact_Department   1 "Institute for Protein Research, Osaka University"
Contact        contact_address      1 "2-3, Yamadaoka, Suita, Osaka 230-0045, Japan"
Contact        contact_email        1 "xxxxx@protein.osaka-u.ac.jp"
Contact        contact_phone        1 "+81-99-999-9999"
Contact        contact_fax          1 "+81-99-999-9999"
Citations      PubMedId            1 "."
Citations      title                1 "Solution structure of 13C/15N labeled protein"
Citations      status               1 "in preparation"
Citations      type                 1 "journal"
Citations      Journal_name         1 "To be Published"
Citations      citation_author      1 "Kobayashi, N."
Citations      citation_author      2 "Harano, Y."
Citations      citation_author      3 "Nakatani, E."
Citations      citation_author      4 "Fujiwara, T."
Citations      citation_author      5 "Akutsu, H."
Entity         name                 1 "domain_1"
Entity         type                 1 "polymer"
Entity         polymer              1 "polypeptide (L)"
Entity         sequence             1 "FSDLKFDHIASLGSVVSIAHSLIVAHSLLINWLIIRSSPSYLI GAHSLIVAHSLMI LWLHSL"
Entity         length               1 "93"
Entity         ambiguous_conformer  1 "no"
Entity         ambiguous_chem_site  1 "no"
Entity         non_standard_monomer 1 "no"
Entity         non_standard_chiral  1 "no"
Entity         non_standard_linker  1 "no"
Entity         paramagnetic_metals 1 "no"
```

Fig. S3. Example of a BESS intermediate format (\*.pre and \*.fin) file. This file describes 22-25 mandatory items required for BMRB deposition of a single chain protein. The first and second columns construct a simple category tree and the third column indicates the item number. The final column describes the detail of each item.

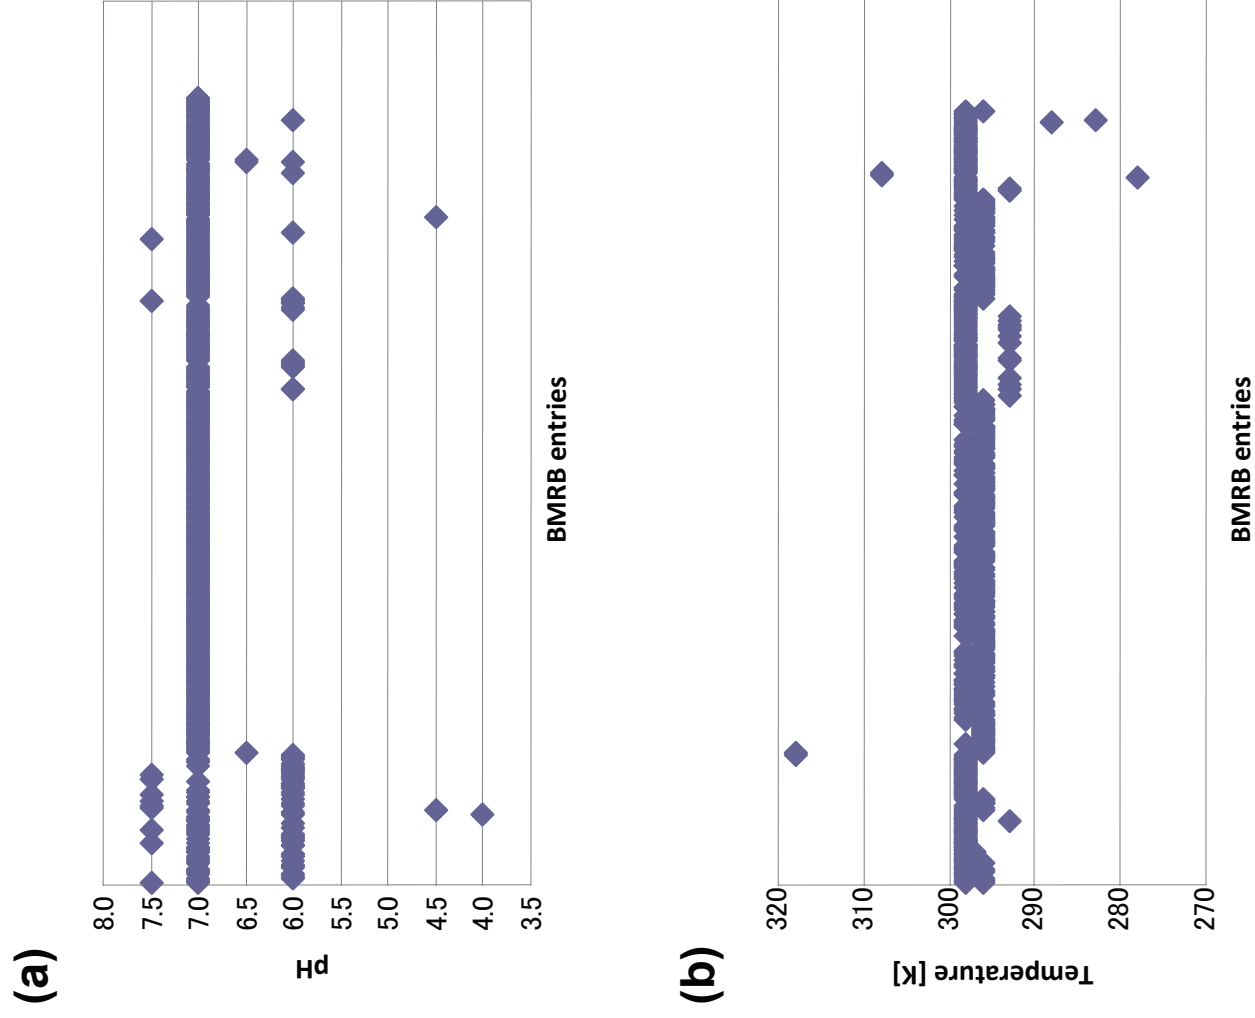

Fig. S4. Distributions of over 600 entries with respect to sample pH (a), temperature in K (b) and field strength in MHz (c). The row axis in panels (a) and (b) correspond to each entry for the deposition.

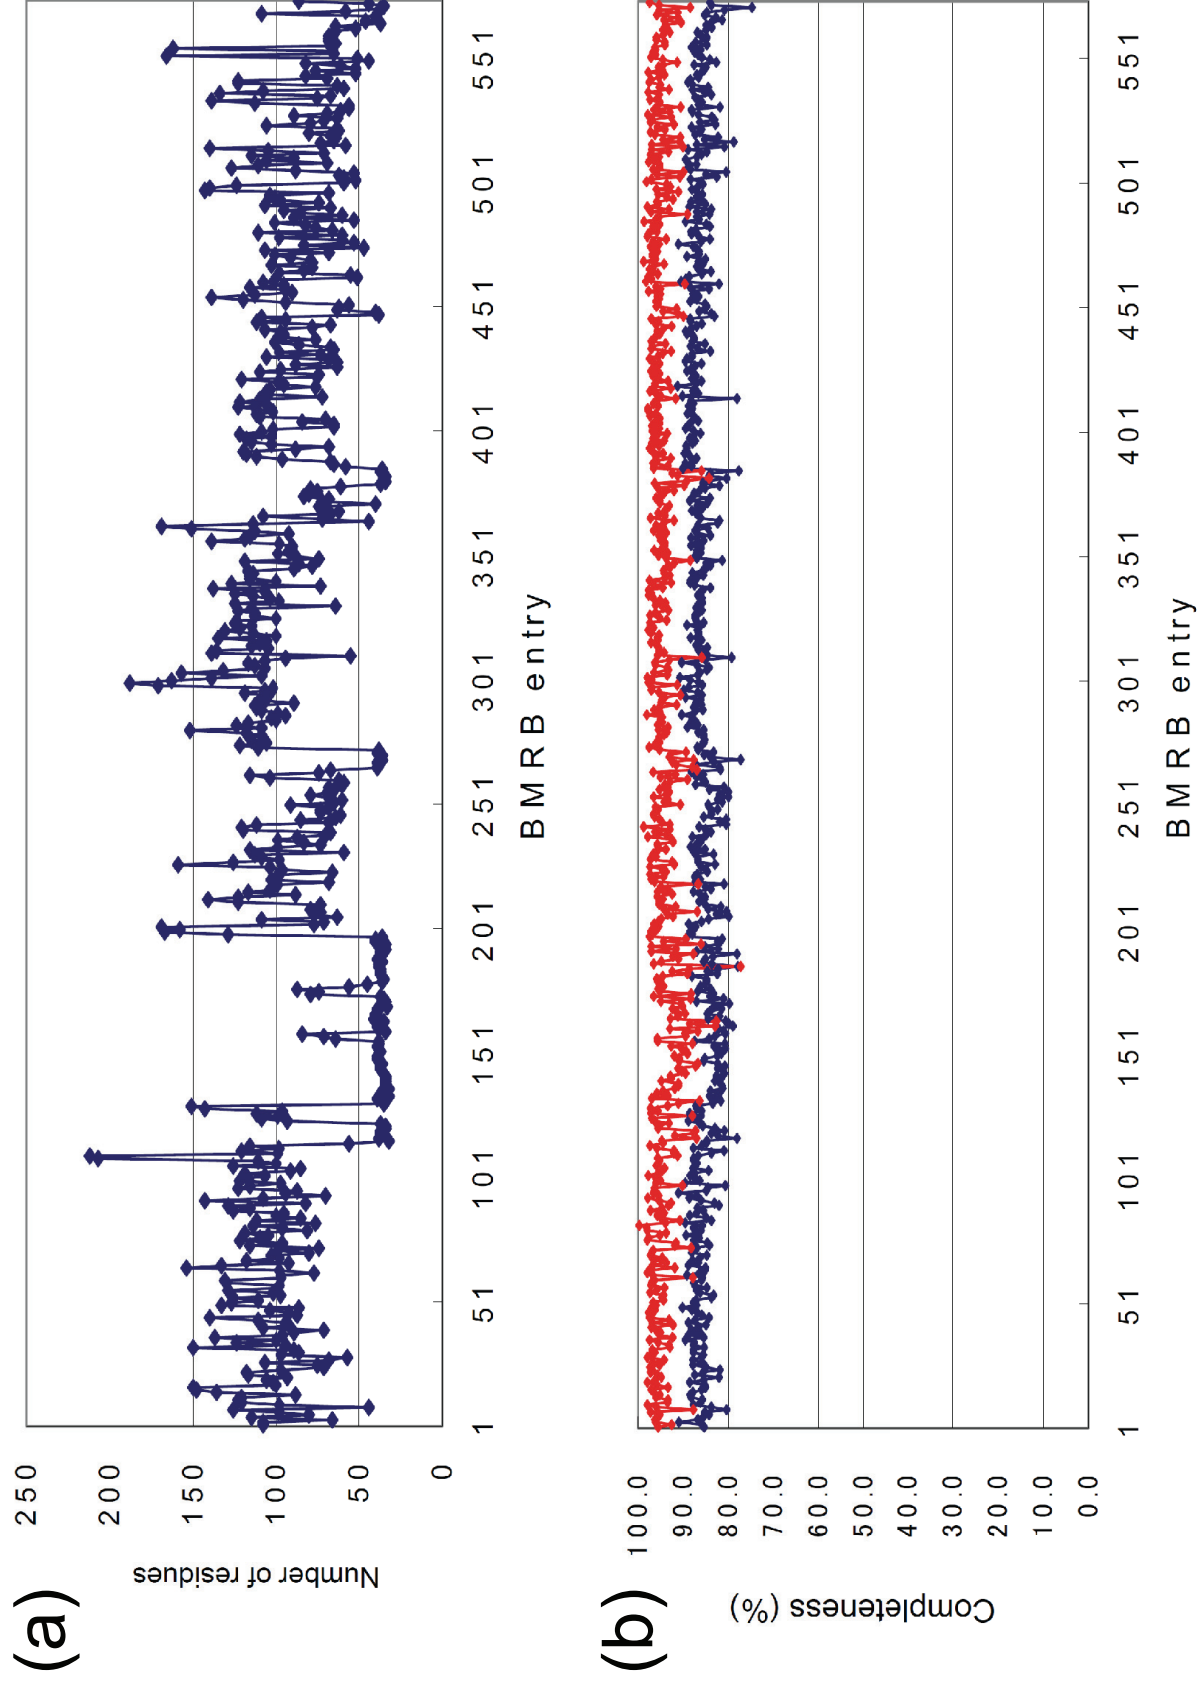

Fig. S5. (a) Chain length variation of the 553 RSGI entries. The entries not released at present are not shown. (b) The completeness of the signal assignments including  $^1\text{H}$ ,  $^{15}\text{N}$  and  $^{13}\text{C}$  atoms plotted for the 553 RSGI entries for backbone including HN, N, C', C $\alpha$  and H $\alpha$  atoms (red) and for all atoms (blue) observable in NMR structural studies.
